# Supplementary material for: Arctic introgression and chromatin regulation facilitated rapid Qinghai-Tibet Plateau colonization by an avian predator
Source: Springer Nature journal article supplement (doi:10.1038/s41467-022-34138-3), 2022-10-27
Supplement: MOESM2 [file 41467_2022_34138_MOESM2_ESM.pdf]

### **Description of Additional Supplementary Files**

File Name: Supplementary Data 1

Description: Statistics of the whole genome resequencing data for the falcons.

File Name: Supplementary Data 2

Description: Genes in the adaptively introgressed regions.

File Name: Supplementary Data 3

Description: Positively selected genes in the QTP sakers identified by XP-EHH method.

File Name: Supplementary Data 4

Description: Genes in the focal selective sweep of Chr 4.
